# Supplementary material for: The cross-talk between DDR1 and STAT3 promotes the development of hepatocellular carcinoma
Source: publisher site journal article supplement (doi:10.18632/aging.103482), 2020-07-27
Supplement: Supplementary file 1 [file aging-v12i14-103482-supplementary-material-SD1.pdf]

## SUPPLEMENTARY MATERIALS

### 1 Promoter sequence of DDR1

GAGATGCTGCCCCACCCCTTAGGCCCGAGGG  
ATCAGGAGCTATGGGACCAGAGGCCCTGTCAT  
CTTTACTGCTGCTGCTCTTGGTGGCAAGTGGAG  
ATGCTGACATGAAGGGACATTTTGATCCTGGTG  
AGGAGACTGAATCATGGGTCCCTGAGGGCCAG  
GGCTTGGGAGGTAGAGAGTTGGGGGCCTTGAC  
CTGTTACATGCCTGCTTTTTACTCAGCCAAGTG  
CCGCTATGCCCTGGGCATGCAGGACCGGACCAT  
CCCAGACAGTGACATCTCTGCTTCCAGCTCCTG  
GTCAGATTCCACTGCCGCCCCGACAGCAGGTA  
CTTGGCACACCTGGCACACTTGTAGCTGCCCCG  
AGAGGAGCTCCTGGGACCTCTACTTCCCCTCCA  
ACCCCTCTGCCCATGCCAGTGAAACCCCTGCAG  
GCTGAGGGGGCAAATGAAGTGGGGTTTAAATA  
CTGGAGATGGAGGCAGACCTGGGGCCAGATGT  
TCTCTGTGCCCTCTTACCCTCAGGTTGGAGA  
GCAGTGACGGGGATGGGGCCTGGTGCCCCGCA  
GGGTGCGTGTTCCTCAAGGAGGAGGAGTACTT  
GCAGGTGGATCTACAACGACTGCACCTGGTGG  
CTCTGGTGGGCACCCAGGGACGGCATGCCGGG  
GGCCTGGGCAAGGAGTTCTCCCGGAGCTACCG  
GCTGCGTTACTCCCGGATGGTCGCCGCTGGAT  
GGGCTGGAAGGACCGCTGGGGTCAGGAGGTGA  
GACTGGCAGGGGCAGCACCCAGAGGAGGTTGG  
CTCTCCTCACTTCCAGCTGTACTTTAAACACCA  
CCTATACGCTGACGACTCTCCAGTTTATATCAT  
CTCCAGACTAAGCCTCTCAGCTGAGCTCCAAAC  
AATATTGTAACCTGGCCACCTTTTGGATTTCT  
CCACTTAGATGTCTTTTTTTTTTTTCTAATAGA  
TGGGGTCTTGCTGTGTTGCCAGGCTGGTCTTG  
AACTCCTGGGCTCAGTGATCCTCCACCTTAGC  
CTCCCAAAGTGCTGGGATTACAAGCACTGTAGC  
CAGCCACCTAGATGTCTAATAGGCATCTCAAAC

GTACGTTTAACTTCCCAAGCTGAATTTGATTCC  
CATTCCCAGCCTAAACCTGCTCCTCCCCTGGCA  
TTCTCCAGCTCAGGAAGTGGTATCACCATTGCC  
TGGTTGCCTAGGCTATAAGTTAAGATGATATCC  
TTGATTCCTTTTTTCTCTCACCTCCTTCCAAAG  
CATCAGCAGCCCCGTCTGTTCTACCTCCATAGT  
GTTCTGAGTCCAGTCACTCCTCACTACTCCAC  
CTCTACTGCCCTAGGCCACCTGCCCGCCATCTC  
CAGCTTAGATGAGTGCAGTAGATGCCAAACGC  
GTCTCCCTGCTTCTGCCTTTTTCTGCCTGGAGTC  
AAATCTCCACCTGGGGGGGGCGGCATCCAGTGG  
ACCTTAGAGCATGTAAATCAGATACGTCACACC  
TAGCTGACACCCCCATGCTGGCTTTTCACTCTG  
CCAGAACAAAAGCTGAGTCCCTAGCTGGTGCA  
GGATGCTCAGCCTGACCTGGCTCCTGCCTGCAT  
CACTTGTCTTGGCGCCTCCTTGGCCACGCTGC  
CTTCTTCTTGTGCTGGAACAAGCCAGGGCTC  
GTTCCCACAGCTTCTGGACATTTTCTCTGTGCC  
GCAAAGCTCCTCCCCTAAATAACCACAGGCTCT  
CCCTCACTCCATTAGTCTCTGCCAGGTGTCA  
CCTCCTTAGAGAGCCTTTTCTGGCCACCCACCT  
CACTGCTCTGTCCATACTTCTGCCTCTTGTCT  
TCGCAGCTGTTTTCCCTGCTGGGATCTCAGTCTT  
ACAAGGGTGGGGAGTGACGTTCACTACTGAGA  
ACGCGCCTGGCACAGAGCGGGCACTCAGCCAA  
CTTCTGCTGAATGAACAGAGGGGAATGGGCTGA  
AATGAAGGGGAAGCTGAGGCAGGGGTGCAGGG  
CTGTGAGGATTGGGGAGAATCTGGGCACAATG  
GGATGATAGGCTTGAGACAAATGGATGGAGC  
CAGGCAAGGAGAAGAGGGCAGCTGAGCCTGAA  
GTCTGAGGATGGAACATCAGAGCTGCGACAGA  
GCCAGAGGTCTCAGCTGCAGATCTTCATTTAC  
CCATGCCTGGCTGCGCCCCACAGTGCTGTGTGC  
TCGGTGCCACCCCTCATGGGTCTAAGTGGCC  
ACTGTG
